# Supplementary material for: Measuring experiences of facility-based care for pregnant women and newborns: a scoping review
Source: HighWire-hosted journal article supplement (doi:10.1136/bmjgh-2020-003368), 2020-11-01
Supplement: bmjgh-2020-003368supp001_data_supplement.pdf [file bmjgh-2020-003368supp001_data_supplement.pdf]

*(maternal health[tiab] OR maternal service\*[tiab] OR maternity care[tiab] OR maternal care[tiab] OR maternity service\*[tiab] OR "Maternal Health"[mesh] OR "Maternal Health Services"[mesh])*

*AND*

*(experience[tiab] OR experiences[tiab] OR patient-centered[tiab] OR woman centered[tiab] OR women centered[tiab] OR client centered[tiab] OR satisfaction[tiab] OR social support\*[tiab] OR emotional support\*[tiab] OR provider choice[tiab] OR choice of provider[tiab] OR wait time\*[tiab] OR affordability[tiab] OR dignity[tiab] OR respect[tiab] OR privacy[tiab] OR confidentiality[tiab] OR discrimination[tiab] OR communication[tiab] OR disrespect[tiab] OR abuse[tiab] OR mistreatment[tiab] OR perception\*[tiab])*
