# Supplementary material for: Measuring experiences of facility-based care for pregnant women and newborns: a scoping review
Source: HighWire-hosted journal article supplement (doi:10.1136/bmjgh-2020-003368), 2020-11-01
Supplement: bmjgh-2020-003368supp003_data_supplement.pdf [file bmjgh-2020-003368supp003_data_supplement.pdf]

| First author | Title                                                                                                                                                     | Year of publication | Main study aim            | Country of data collection | Period of care                  | Instrument validation     | Domains                                                                                     |
|--------------|-----------------------------------------------------------------------------------------------------------------------------------------------------------|---------------------|---------------------------|----------------------------|---------------------------------|---------------------------|---------------------------------------------------------------------------------------------|
| Freedman     | Eye of the beholder? Observation versus self-report in the measurement of disrespect and abuse during facility-based childbirth                           | 2018                | Instrument validation     | Tanzania                   | labor and childbirth            | Instrument not validated  | communication, respect & dignity, privacy, nondiscrimination, social support, affordability |
| Kruk         | Disrespectful and abusive treatment during facility delivery in Tanzania: a facility and community survey                                                 | 2018                | Measurement               | Tanzania                   | labor and childbirth            | Instrument not validated  | communication, respect & dignity, autonomy, privacy, confidentiality                        |
| Kujawski     | Community and health system intervention to reduce disrespect and abuse during childbirth in Tanga Region, Tanzania: A comparative before-and-after study | 2017                | Program/Policy evaluation | Tanzania                   | labor and childbirth            | Instrument not validated  | communication, respect & dignity, autonomy, privacy, confidentiality, social support        |
| Kujawski     | Association Between Disrespect and Abuse During Childbirth and Women's Confidence in Health Facilities in Tanzania                                        | 2015                | Measurement               | Tanzania                   | labor and childbirth            | Used validated instrument | respect & dignity                                                                           |
| Kingston     | Comparison of adolescent, young adult, and adult women's maternity experiences and practices                                                              | 2012                | Measurement               | Canada                     | antenatal, labor and childbirth | Instrument not validated  | communication, respect & dignity, privacy, autonomy, kindness, ease of use of the system    |
| Smarandache  | Predictors of a negative labour and birth experience based on a national survey of Canadian women                                                         | 2016                | Measurement               | Canada                     | labor and childbirth            | Instrument not validated  | communication, ease of use of the system                                                    |
| Dencker      | Childbirth experience questionnaire (CEQ): development and evaluation of a multidimensional instrument                                                    | 2010                | Instrument validation     | Sweden                     | labor and childbirth            | Validation study          | communication, respect & dignity, autonomy, social support, user voice                      |
| Turkmen      | Post-partum duration of satisfaction with childbirth                                                                                                      | 2018                | Measurement               | Sweden                     | labor and childbirth            | Used validated instrument | communication, respect & dignity, autonomy, social support, user voice                      |

|           |                                                                                                                                                     |      |                           |                     |                                                     |                                        |                                                                                                      |
|-----------|-----------------------------------------------------------------------------------------------------------------------------------------------------|------|---------------------------|---------------------|-----------------------------------------------------|----------------------------------------|------------------------------------------------------------------------------------------------------|
| Walker    | Childbirth experience questionnaire: validating its use in the United Kingdom                                                                       | 2015 | Instrument validation     | United Kingdom      | labor and childbirth                                | Validation study                       | communication, respect & dignity, autonomy, social support, kindness, user voice, choice of provider |
| Bertucci  | Assessing the perception of the childbirth experience in Italian women: A contribution to the adaptation of the childbirth perception questionnaire | 2012 | Instrument validation     | Italy               | labor and childbirth                                | Validation study                       | autonomy, social support                                                                             |
| Henderson | Experiencing maternity care: the care received and perceptions of women from different ethnic groups                                                | 2013 | Measurement               | United Kingdom      | antenatal, labor and childbirth, postnatal          | Instrument not validated               | communication, respect & dignity, autonomy, kindness, social support, choice of provider             |
| Redshaw   | Women with disability: the experience of maternity care during pregnancy, labour and birth and the postnatal period                                 | 2013 | Measurement               | United Kingdom      | antenatal, labor and childbirth, postnatal          | Instrument not validated               | communication, respect & dignity, autonomy, kindness, social support, choice of provider, user voice |
| Henderson | Change over time in women's views and experiences of maternity care in England, 1995-2014: A comparison using survey data                           | 2017 | Measurement               | United Kingdom      | antenatal, labor and childbirth, postnatal          | Has components of validated instrument | communication, respect & dignity, autonomy, social support                                           |
| Henderson | Who is well after childbirth? Factors related to positive outcome                                                                                   | 2013 | Measurement               | United Kingdom      | antenatal, labor and childbirth, postnatal          | Has components of validated instrument | communication, respect & dignity, autonomy, kindness                                                 |
| Kruk      | Evaluation Of A Maternal Health Program In Uganda And Zambia Finds Mixed Results On Quality Of Care And Satisfaction                                | 2016 | Program/Policy evaluation | Multi-Uganda,Zambia | labor and childbirth                                | Instrument not validated               | communication, respect & dignity, privacy                                                            |
| Larson    | Determinants of perceived quality of obstetric care in rural Tanzania: a cross-sectional study                                                      | 2014 | Measurement               | Tanzania            | labor and childbirth                                | Instrument not validated               | communication, respect & dignity, privacy, affordability                                             |
| Vedam     | Patient-led decision making: Measuring autonomy and respect in Canadian maternity care                                                              | 2019 | Measurement               | Canada              | antenatal, labor and childbirth, postnatal, newborn | Used validated instrument              | communication, respect & dignity, autonomy, user voice, nondiscrimination                            |

|         |                                                                                                                                                                      |      |                           |                           |                                                     |                           |                                                                                                                            |
|---------|----------------------------------------------------------------------------------------------------------------------------------------------------------------------|------|---------------------------|---------------------------|-----------------------------------------------------|---------------------------|----------------------------------------------------------------------------------------------------------------------------|
| Vedam   | The Mother's Autonomy in Decision Making (MADM) scale: Patient-led development and psychometric testing of a new instrument to evaluate experience of maternity care | 2017 | Instrument validation     | Canada                    | antenatal, labor and childbirth, postnatal, newborn | Validation study          | communication, respect & dignity, autonomy, user voice                                                                     |
| Ford    | Are women birthing in New South Wales hospitals satisfied with their care?                                                                                           | 2015 | Measurement               | Australia                 | labor and childbirth                                | Used validated instrument | communication, respect & dignity                                                                                           |
| Todd    | "Very Good" Ratings in a Survey of Maternity Care: Kindness and Understanding Matter to Australian Women.                                                            | 2017 | Measurement               | Australia                 | antenatal, labor and childbirth, postnatal          | Instrument not validated  | communication, kindness, autonomy, social support, user voice, ease of use of the system                                   |
| Afulani | Predictors of person-centered maternity care: the role of socioeconomic status, empowerment, and facility type                                                       | 2018 | Measurement               | Kenya                     | labor and childbirth                                | Used validated instrument | communication, respect & dignity, autonomy, confidentiality, social support, wait time                                     |
| Afulani | Can an integrated obstetric emergency simulation training improve respectful maternity care? Results from a pilot study in Ghana                                     | 2019 | Program/Policy evaluation | Ghana                     | labor and childbirth                                | Used validated instrument | communication, respect & dignity, privacy, autonomy, confidentiality, social support, wait time                            |
| Afulani | Development of a tool to measure personcentered maternity care in developing settings: validation in a rural and urban Kenyan population                             | 2017 | Instrument validation     | Kenya                     | labor and childbirth                                | Validation study          | communication, respect & dignity, privacy, autonomy, confidentiality, social support, wait time                            |
| Afulani | Validation of the person-centered maternity care scale in India                                                                                                      | 2018 | Instrument validation     | India                     | labor and childbirth                                | Validation study          | communication, respect & dignity, privacy, autonomy, confidentiality, social support, ease of use of the system, wait time |
| Afulani | Person-centred maternity care in low-income and middle-income countries: analysis of data from Kenya, Ghana, and India                                               | 2019 | Measurement               | Multi-Kenya, Ghana, India | labor and childbirth                                | Used validated instrument | communication, respect & dignity, privacy, autonomy, confidentiality, kindness, social support, wait time                  |

|                  |                                                                                                                                                                      |      |                           |             |                                            |                           |                                                                                                                       |
|------------------|----------------------------------------------------------------------------------------------------------------------------------------------------------------------|------|---------------------------|-------------|--------------------------------------------|---------------------------|-----------------------------------------------------------------------------------------------------------------------|
| Afulani          | Companionship during facility-based childbirth: results from a mixed-methods study with recently delivered women and providers in Kenya                              | 2018 | Measurement               | Kenya       | labor and childbirth                       | Instrument not validated  | social support                                                                                                        |
| Truijens         | The Effect of Multiprofessional Simulation-Based Obstetric Team Training on Patient-Reported Quality of Care                                                         | 2015 | Program/Policy evaluation | Netherlands | labor and childbirth                       | Used validated instrument | communication, respect & dignity, autonomy, confidentiality, social support                                           |
| Truijens         | Development of the Pregnancy and Childbirth Questionnaire (PCQ): evaluating quality of care as perceived by women who recently gave birth                            | 2014 | Instrument validation     | Netherlands | labor and childbirth                       | Validation study          | communication, respect & dignity, autonomy, confidentiality, kindness, social support                                 |
| Sjetne           | Do experiences with pregnancy, birth and postnatal care in Norway vary by the women's geographic origin? a comparison of cross-sectional survey results              | 2017 | Measurement               | Norway      | antenatal, labor and childbirth, postnatal | Used validated instrument | communication, respect & dignity, kindness, social support, user voice, choice of provider, ease of use of the system |
| Sjetne           | A questionnaire to measure women's experiences with pregnancy, birth and postnatal care: instrument development and assessment following a national survey in Norway | 2015 | Instrument validation     | Norway      | antenatal, labor and childbirth, postnatal | Validation study          | communication, respect & dignity, kindness, social support, ease of use of the system                                 |
| Donate-Manzanas  | Cross-cultural adaptation and validation of the psychometric properties of the Quality from the Patient's Perspective I Questionnaire translated into Spanish        | 2017 | Instrument validation     | Spain       | labor and childbirth                       | Validation study          | communication, respect & dignity, autonomy, kindness, social support, user voice                                      |
| Gamedze-Mshayisa | Factors associated with women's perception of and satisfaction with quality of intrapartum care practices in Swaziland                                               | 2018 | Measurement               | eSwatini    | labor and childbirth                       | Used validated instrument | communication, respect & dignity, privacy, social support, user voice, wait time                                      |

|              |                                                                                                                                              |      |                       |             |                                            |                                        |                                                                                                                                                                      |
|--------------|----------------------------------------------------------------------------------------------------------------------------------------------|------|-----------------------|-------------|--------------------------------------------|----------------------------------------|----------------------------------------------------------------------------------------------------------------------------------------------------------------------|
| Redshaw      | Young women's recent experience of labour and birth care in Queensland                                                                       | 2014 | Measurement           | Australia   | labor and childbirth, newborn              | Has components of validated instrument | communication, respect & dignity, privacy, autonomy, kindness, social support                                                                                        |
| Mander       | Perceived Safety, Quality and Cultural Competency of Maternity Care for Culturally and Linguistically Diverse Women in Queensland            | 2016 | Measurement           | Australia   | antenatal, labor and childbirth, postnatal | Instrument not validated               | communication, respect & dignity, privacy, autonomy, kindness, social support, user voice, choice of provider, ease of use of the system                             |
| Wyles        | Does it get better with age? Women's experience of communication in maternity care                                                           | 2019 | Measurement           | Australia   | antenatal, labor and childbirth            | Instrument not validated               | communication, respect & dignity, privacy, autonomy, kindness, user voice                                                                                            |
| Scheerhagen  | Measuring clients' experiences with antenatal care before or after childbirth: it matters                                                    | 2018 | Instrument validation | Netherlands | antenatal, labor and childbirth, postnatal | Used validated instrument              | communication, respect & dignity, privacy, autonomy, confidentiality, kindness, social support, user voice, choice of provider, ease of use of the system, wait time |
| Scheerhagen  | Measuring client experiences in maternity care under change: development of a questionnaire based on the WHO Responsiveness model            | 2015 | Instrument validation | Netherlands | antenatal, labor and childbirth, postnatal | Validation study                       | communication, respect & dignity, privacy, autonomy, confidentiality, kindness, social support, user voice, choice of provider, wait time                            |
| Scheerhagen  | Applicability of the ReproQ client experiences questionnaire for quality improvement in maternity care                                       | 2016 | Instrument validation | Netherlands | labor and childbirth                       | Validation study                       | communication, respect & dignity, privacy, autonomy, confidentiality, kindness, social support, user voice, choice of provider, wait time                            |
| van der Kooy | Quality of perinatal care services from the user's perspective: a Dutch study applies the World Health Organization's responsiveness concept | 2017 | Measurement           | Netherlands | antenatal, labor and childbirth            | Used validated instrument              | communication, respect & dignity, privacy, autonomy, confidentiality, kindness, social support, user voice, choice of provider, wait time, ease of use of the system |

|              |                                                                                                                                                                                   |      |                           |                |                                            |                           |                                                                                                                                                  |
|--------------|-----------------------------------------------------------------------------------------------------------------------------------------------------------------------------------|------|---------------------------|----------------|--------------------------------------------|---------------------------|--------------------------------------------------------------------------------------------------------------------------------------------------|
| van der Kooy | Validity of a questionnaire measuring the world health organization concept of health system responsiveness with respect to perinatal services in the Dutch obstetric care system | 2014 | Instrument validation     | Netherlands    | antenatal, labor and childbirth, postnatal | Validation study          | communication, respect & dignity, privacy, autonomy, confidentiality, social support, choice of provider, wait time, ease of use of the system   |
| van Stenus   | Client experiences with perinatal healthcare for high-risk and low-risk women                                                                                                     | 2018 | Measurement               | Netherlands    | labor and childbirth, postnatal            | Used validated instrument | communication, respect & dignity, privacy, autonomy, confidentiality, kindness, social support, user voice, wait time, ease of use of the system |
| Colley       | Women's perception of support and control during childbirth in The Gambia, a quantitative study on dignified facility-based intrapartum care                                      | 2018 | Measurement               | Gambia, The    | labor and childbirth                       | Used validated instrument | communication, respect & dignity, privacy, autonomy, social support, kindness, user voice                                                        |
| Ford         | Measurement of Maternal Perceptions of Support and Control in Birth (SCIB)                                                                                                        | 2009 | Instrument validation     | United Kingdom | labor and childbirth                       | Validation study          | communication, respect & dignity, privacy, autonomy, social support, user voice                                                                  |
| Inci         | The Turkish version of perceived support and control in birth scale                                                                                                               | 2015 | Instrument validation     | Turkey         | labor and childbirth                       | Validation study          | communication, respect & dignity, privacy, autonomy, social support, kindness, user voice                                                        |
| Thyagarajan  | Parental perceptions of hypothermia treatment for neonatal hypoxic-ischaemic encephalopathy                                                                                       | 2018 | Measurement               | United Kingdom | newborn                                    | Instrument not validated  | communication, social support                                                                                                                    |
| Abuya        | The effect of a multi-component intervention on disrespect and abuse during childbirth in Kenya                                                                                   | 2015 | Program/Policy evaluation | Kenya          | labor and childbirth                       | Instrument not validated  | communication, respect & dignity, privacy, confidentiality, autonomy                                                                             |
| Abuya        | Exploring the prevalence of disrespect and abuse during childbirth in Kenya                                                                                                       | 2015 | Instrument validation     | Kenya          | labor and childbirth                       | Validation study          | communication, respect & dignity, privacy, confidentiality, autonomy                                                                             |
| Abuya        | Measuring mistreatment of women throughout the birthing process: implications for quality of care assessments                                                                     | 2018 | Measurement               | Kenya          | labor and childbirth                       | Instrument not validated  | communication, respect & dignity, privacy, confidentiality, autonomy, kindness                                                                   |

|           |                                                                                                                                                                   |      |                       |               |                                 |                                        |                                                                                |
|-----------|-------------------------------------------------------------------------------------------------------------------------------------------------------------------|------|-----------------------|---------------|---------------------------------|----------------------------------------|--------------------------------------------------------------------------------|
| Alzyoud   | Exposure to verbal abuse and neglect during childbirth among Jordanian women                                                                                      | 2018 | Measurement           | Jordan        | labor and childbirth            | Instrument not validated               | communication, respect & dignity, privacy, kindness, social support            |
| Anderson  | Construct Validity of the Childbirth Trauma Index for Adolescents                                                                                                 | 2011 | Instrument validation | United States | labor and childbirth            | Validation study                       | kindness, social support                                                       |
| Asefa     | Prevention of mother-to-child transmission (PMTCT) of HIV services in Adama town, Ethiopia: clients' satisfaction and challenges experienced by service providers | 2014 | Measurement           | Ethiopia      | antenatal, other                | Instrument not validated               | communication, privacy, wait time                                              |
| Asefa     | Status of respectful and non-abusive care during facility-based childbirth in a hospital and health centers in Addis Ababa, Ethiopia                              | 2015 | Measurement           | Ethiopia      | labor and childbirth            | Used validated instrument              | communication, respect & dignity, autonomy, nondiscrimination, privacy         |
| Ashraf    | Assessing women's satisfaction level with maternity services: Evidence from Pakistan                                                                              | 2012 | Measurement           | Pakistan      | labor and childbirth            | Has components of validated instrument | communication, wait time                                                       |
| Attanasio | Factors influencing women's perceptions of shared decision making during labor and delivery: Results from a large-scale cohort study of first childbirth          | 2018 | Measurement           | United States | labor and childbirth            | Instrument not validated               | respect & dignity, autonomy, user voice                                        |
| Attanasio | Patient-reported Communication Quality and Perceived Discrimination in Maternity Care                                                                             | 2015 | Measurement           | United States | antenatal, labor and childbirth | Instrument not validated               | communication, nondiscrimination                                               |
| Avortri   | Predictors of satisfaction with child birth services in public hospitals in Ghana                                                                                 | 2011 | Measurement           | Ghana         | labor and childbirth            | Has components of validated instrument | communication, respect & dignity, privacy, autonomy, social support, wait time |
| Azhar     | Disrespect and abuse during childbirth in district Gujrat, Pakistan: A quest for respectful maternity care                                                        | 2018 | Measurement           | Pakistan      | labor and childbirth            | Instrument not validated               | communication, respect & dignity, privacy, nondiscrimination, social support   |

|              |                                                                                                                                                                                                |      |                           |                      |                      |                           |                                                                                                         |
|--------------|------------------------------------------------------------------------------------------------------------------------------------------------------------------------------------------------|------|---------------------------|----------------------|----------------------|---------------------------|---------------------------------------------------------------------------------------------------------|
| Banks        | Jeopardizing quality at the frontline of healthcare: prevalence and risk factors for disrespect and abuse during facility-based childbirth in Ethiopia                                         | 2018 | Measurement               | Ethiopia             | labor and childbirth | Instrument not validated  | communication, respect & dignity, autonomy, privacy, nondiscrimination, confidentiality, kindness       |
| Bashour      | The effect of training doctors in communication skills on women's satisfaction with doctor-woman relationship during labour and delivery: A stepped wedge cluster randomised trial in Damascus | 2013 | Program/Policy evaluation | Syrian Arab Republic | labor and childbirth | Used validated instrument | communication, respect & dignity, kindness                                                              |
| Bernitz      | Evaluation of satisfaction with care in a midwifery unit and an obstetric unit: a randomized controlled trial of low-risk women                                                                | 2016 | Program/Policy evaluation | Norway               | labor and childbirth | Used validated instrument | ease of use of the system                                                                               |
| Bhattacharya | Silent voices: institutional disrespect and abuse during delivery among women of Varanasi district, northern India                                                                             | 2018 | Measurement               | India                | labor and childbirth | Instrument not validated  | communication, respect & dignity, autonomy, privacy, nondiscrimination, confidentiality, social support |
| Bohren       | Methodological development of tools to measure how women are treated during facility-based childbirth in four countries: labor observation and community survey                                | 2018 | Measurement               | Ghana                | labor and childbirth | Used validated instrument | communication, respect & dignity, privacy, nondiscrimination, confidentiality, social support           |
| Brandao      | Childbirth experiences related to obstetric violence in public health units in Quito, Ecuador                                                                                                  | 2018 | Measurement               | Ecuador              | labor and childbirth | Instrument not validated  | communication, respect & dignity, autonomy, privacy, nondiscrimination, confidentiality                 |
| Colombar a   | Institutional Delivery and Satisfaction among Indigenous and Poor Women in Guatemala, Mexico, and Panama                                                                                       | 2016 | Measurement               | Multi-Guat, Mex, Pan | labor and childbirth | Instrument not validated  | respect & dignity, autonomy                                                                             |



|              |                                                                                                                                                                                                             |      |             |            |                                                     |                           |                                                                                                                       |
|--------------|-------------------------------------------------------------------------------------------------------------------------------------------------------------------------------------------------------------|------|-------------|------------|-----------------------------------------------------|---------------------------|-----------------------------------------------------------------------------------------------------------------------|
| Creanga      | Is quality of care a key predictor of perinatal health care utilization and patient satisfaction in Malawi?                                                                                                 | 2017 | Measurement | Malawi     | antenatal, labor and childbirth, postnatal, newborn | Instrument not validated  | communication, respect & dignity, privacy, kindness                                                                   |
| da Silva     | Quality of care for labor and childbirth in a public hospital network in a Brazilian state capital: patient satisfaction                                                                                    | 2017 | Measurement | Brazil     | antenatal, labor and childbirth, newborn            | Instrument not validated  | communication, respect & dignity, privacy, kindness, social support, user voice, ease of use of the system, wait time |
| Dauletyarova | Are Women of East Kazakhstan Satisfied with the Quality of Maternity Care? Implementing the WHO Tool to Assess the Quality of Hospital Services                                                             | 2016 | Measurement | Kazakhstan | antenatal, labor and childbirth, postnatal, newborn | Instrument not validated  | communication, respect & dignity, autonomy, social support                                                            |
| Devkota      | Do experiences and perceptions about quality of care differ among social groups in Nepal?: A study of maternal healthcare experiences of women with and without disabilities, and Dalit and non-Dalit women | 2017 | Measurement | Nepal      | antenatal, labor and childbirth                     | Used validated instrument | communication, respect & dignity, privacy, kindness, ease of use of the system                                        |
| Dey          | Discordance in self-report and observation data on mistreatment of women by providers during childbirth in Uttar Pradesh, India                                                                             | 2017 | Measurement | India      | labor and childbirth                                | Instrument not validated  | communication, respect & dignity, autonomy, nondiscrimination, ease of use of the system                              |
| Dynes        | Client and provider factors associated with companionship during labor and birth in Kigoma Region, Tanzania                                                                                                 | 2019 | Measurement | Tanzania   | labor and childbirth                                | Instrument not validated  | social support                                                                                                        |
| Dynes        | Patient and provider determinants for receipt of three dimensions of respectful maternity care in Kigoma Region, Tanzania April-July, 2016                                                                  | 2018 | Measurement | Tanzania   | labor and childbirth                                | Instrument not validated  | communication, respect & dignity, privacy, confidentiality, kindness, social support, user voice, wait time           |

|              |                                                                                                                                                       |      |                           |                   |                                            |                                        |                                                                                                           |
|--------------|-------------------------------------------------------------------------------------------------------------------------------------------------------|------|---------------------------|-------------------|--------------------------------------------|----------------------------------------|-----------------------------------------------------------------------------------------------------------|
| Feinstein    | Antenatal and delivery services in Kinshasa, Democratic Republic of Congo: care-seeking and experiences reported by women in a household-based survey | 2013 | Measurement of other      | Congo, Dem. Rep.  | antenatal                                  | Instrument not validated               | communication, respect & dignity, privacy, wait time                                                      |
| Fisseha      | Quality of the delivery services in health facilities in Northern Ethiopia                                                                            | 2017 | Measurement               | Ethiopia          | labor and childbirth                       | Instrument not validated               | communication                                                                                             |
| Garrard      | Assessing obstetric patient experience: a SERVQUAL questionnaire                                                                                      | 2013 | Program/Policy evaluation | United Kingdom    | antenatal                                  | Has components of validated instrument | communication, respect & dignity, privacy, autonomy, kindness                                             |
| Gartner      | Good reliability and validity for a new utility instrument measuring the birth experience, the Labor and Delivery Index                               | 2015 | Instrument validation     | Netherlands       | labor and childbirth                       | Validation study                       | communication, respect & dignity, social support, user voice                                              |
| Gebremichael | Mothers' experience of disrespect and abuse during maternity care in northern Ethiopia                                                                | 2018 | Measurement               | Ethiopia          | labor and childbirth                       | Instrument not validated               | communication, respect & dignity, confidentiality, privacy, social support, user voice                    |
| Haines       | The role of women's attitudinal profiles in satisfaction with the quality of their antenatal and intrapartum care                                     | 2013 | Measurement               | Sweden            | antenatal, labor and childbirth            | Used validated instrument              | communication, autonomy, social support, user voice                                                       |
| Hall         | Dignity and respect during pregnancy and childbirth: a survey of the experience of disabled women                                                     | 2018 | Measurement               | Multi-UK, Ireland | antenatal, labor and childbirth, postnatal | Instrument not validated               | communication, respect & dignity, privacy, nondiscrimination, ease of use of the system                   |
| Halperin     | A comparison of Israeli Jewish and Arab women's birth perceptions                                                                                     | 2014 | Measurement               | Israel            | labor and childbirth                       | Used validated instrument              | communication, respect & dignity, user voice                                                              |
| Hameed       | Women's experiences of mistreatment during childbirth: A comparative view of home- and facility-based births in Pakistan                              | 2018 | Measurement               | Pakistan          | labor and childbirth                       | Instrument not validated               | communication, respect & dignity, privacy, nondiscrimination, confidentiality, social support, user voice |

|           |                                                                                                                                                                  |      |                       |           |                                            |                                        |                                                                                                                                                  |
|-----------|------------------------------------------------------------------------------------------------------------------------------------------------------------------|------|-----------------------|-----------|--------------------------------------------|----------------------------------------|--------------------------------------------------------------------------------------------------------------------------------------------------|
| Heaman    | Quality of prenatal care questionnaire: instrument development and testing                                                                                       | 2014 | Instrument validation | Canada    | antenatal                                  | Validation study                       | communication, respect & dignity, privacy, autonomy, confidentiality, kindness, social support, user voice, ease of use of the system, wait time |
| Heatley   | Women's Perceptions of Communication in Pregnancy and Childbirth: Influences on Participation and Satisfaction With Care                                         | 2015 | Measurement           | Australia | antenatal, labor and childbirth, postnatal | Instrument not validated               | communication, autonomy                                                                                                                          |
| Hulton    | Applying a framework for assessing the quality of maternal health services in urban India                                                                        | 2007 | Measurement           | India     | labor and childbirth                       | Instrument not validated               | communication, respect & dignity, kindness, ease of use of the system                                                                            |
| Igarashi  | Immigrants' experiences of maternity care in Japan                                                                                                               | 2013 | Measurement           | Japan     | antenatal, labor and childbirth, postnatal | Instrument not validated               | communication, respect & dignity, kindness                                                                                                       |
| Iida      | The relationship between women-centred care and women's birth experiences: A comparison between birth centres, clinics, and hospitals in Japan                   | 2012 | Measurement           | Japan     | labor and childbirth                       | Used validated instrument              | communication, respect & dignity, autonomy, social support                                                                                       |
| Ijadunola | Lifting the veil on disrespect and abuse in facility-based child birth care: findings from South West Nigeria                                                    | 2019 | Measurement           | Nigeria   | labor and childbirth                       | Instrument not validated               | communication, respect & dignity, privacy, nondiscrimination, confidentiality, social support                                                    |
| Kambala   | Perceptions of quality across the maternal care continuum in the context of a health financing intervention: Evidence from a mixed methods study in rural Malawi | 2017 | Measurement           | Malawi    | antenatal, labor and childbirth, postnatal | Instrument not validated               | communication, privacy, autonomy, confidentiality, social support, user voice                                                                    |
| Karkee    | Women's perception of quality of maternity services: a longitudinal survey in Nepal                                                                              | 2014 | Measurement           | Nepal     | labor and childbirth                       | Has components of validated instrument | respect & dignity, kindness                                                                                                                      |

|                   |                                                                                                                                                                                               |      |                           |                |                                            |                           |                                                                                                |
|-------------------|-----------------------------------------------------------------------------------------------------------------------------------------------------------------------------------------------|------|---------------------------|----------------|--------------------------------------------|---------------------------|------------------------------------------------------------------------------------------------|
| Kifle             | Predictors of Women's Satisfaction with Hospital-Based Intrapartum Care in Asmara Public Hospitals, Eritrea                                                                                   | 2017 | Measurement               | Eritrea        | labor and childbirth                       | Instrument not validated  | communication, respect & dignity, privacy, autonomy, social support, ease of use of the system |
| Kigenyi           | Quality of intrapartum care at Mulago national referral hospital, Uganda: clients' perspective                                                                                                | 2013 | Measurement               | Uganda         | labor and childbirth                       | Instrument not validated  | respect & dignity, privacy, autonomy, confidentiality, wait time                               |
| Lacaze-Masmonteil | Perception du contexte linguistique et culturel minoritaire sur le vécu de la grossesse                                                                                                       | 2013 | Measurement               | Canada         | antenatal, labor and childbirth, postnatal | Instrument not validated  | communication, social support, ease of use of the system, wait time                            |
| Lee               | Efficacy of Warm Showers on Labor Pain and Birth Experiences During the First Labor Stage                                                                                                     | 2013 | Program/Policy evaluation | Taiwan         | labor and childbirth                       | Used validated instrument | autonomy, social support                                                                       |
| Lewis             | Development and validation of a measure of informed choice for women undergoing non-invasive prenatal testing for aneuploidy                                                                  | 2016 | Instrument validation     | United Kingdom | antenatal                                  | Validation study          | autonomy                                                                                       |
| Liabsuetrakul     | Health system responsiveness for delivery care in Southern Thailand                                                                                                                           | 2012 | Measurement               | Thailand       | labor and childbirth                       | Instrument not validated  | communication, respect & dignity, autonomy, social support, choice of provider                 |
| Lin               | Comparison between pregnant Southeast Asian immigrant and Taiwanese women in terms of pregnancy knowledge, attitude toward pregnancy, medical service experiences and prenatal care behaviors | 2008 | Measurement               | Taiwan         | antenatal                                  | Instrument not validated  | communication, ease of use of the system                                                       |
| Lindquist         | Experiences, utilisation and outcomes of maternity care in England among women from different socio-economic groups: findings from the 2010 National Maternity Survey                         | 2015 | Measurement               | United Kingdom | antenatal, labor and childbirth, postnatal | Instrument not validated  | communication, respect & dignity, autonomy, ease of use of the system                          |

|            |                                                                                                                                                                          |      |                           |                |                                                               |                                        |                                                                                                              |
|------------|--------------------------------------------------------------------------------------------------------------------------------------------------------------------------|------|---------------------------|----------------|---------------------------------------------------------------|----------------------------------------|--------------------------------------------------------------------------------------------------------------|
| Macfarlane | Survey of women's experiences of care in a new freestanding midwifery unit in an inner city area of London, England. 1: Methods and women's overall ratings of care      | 2014 | Program/Policy evaluation | United Kingdom | antenatal, labor and childbirth, postnatal                    | Instrument not validated               | respect & dignity, privacy                                                                                   |
| Macfarlane | Survey of women's experiences of care in a new freestanding midwifery unit in an inner city area of London, England: 2. Specific aspects of care                         | 2014 | Measurement               | United Kingdom | labor and childbirth                                          | Instrument not validated               | communication, respect & dignity                                                                             |
| Mahar      | Quantity and quality of information, education and communication during antenatal visit at private and public sector hospitals of Bahawalpur, Pakistan                   | 2012 | Measurement               | Pakistan       | antenatal                                                     | Has components of validated instrument | communication                                                                                                |
| Malouf     | Access and quality of maternity care for disabled women during pregnancy, birth and the postnatal period in England: data from a national survey                         | 2017 | Measurement               | United Kingdom | abortion, antenatal, labor and childbirth, postnatal, newborn | Instrument not validated               | communication, respect & dignity, kindness, social support, user voice, ease of use of the system, wait time |
| Mannarini  | A Rasch-based dimension of delivery experience: spontaneous vs. medically assisted conception                                                                            | 2013 | Measurement               | Italy          | labor and childbirth                                          | Instrument not validated               | respect & dignity                                                                                            |
| Martin     | Midwives' perceptions of communication during videotaped counseling for prenatal anomaly tests: how do they relate to clients' perceptions and independent observations? | 2015 | Instrument validation     | Netherlands    | antenatal                                                     | Validation study                       | communication, autonomy                                                                                      |
| McLachlan  | A randomised controlled trial of caseload midwifery for women at low risk of medical complications (COSMOS): Women's satisfaction with care                              | 2012 | Program/Policy evaluation | Australia      | antenatal, labor and childbirth, postnatal                    | Instrument not validated               | communication, respect & dignity, privacy, autonomy, kindness, social support, user voice                    |

|                   |                                                                                                                                                     |      |             |                    |                                            |                                        |                                                                                                                 |
|-------------------|-----------------------------------------------------------------------------------------------------------------------------------------------------|------|-------------|--------------------|--------------------------------------------|----------------------------------------|-----------------------------------------------------------------------------------------------------------------|
| Mohammad          | Jordanian women's dissatisfaction with childbirth care                                                                                              | 2013 | Measurement | Jordan             | labor and childbirth                       | Used validated instrument              | communication, respect & dignity, privacy, autonomy, kindness, user voice                                       |
| Molina            | Delivery practices and care experience during implementation of an adapted safe childbirth checklist and respectful care program in Chiapas, Mexico | 2019 | Measurement | Mexico             | labor and childbirth                       | Instrument not validated               | communication, privacy, social support                                                                          |
| Molloy            | Improving practice: women's views of a maternity triage service                                                                                     | 2010 | Measurement | United Kingdom     | other                                      | Instrument not validated               | communication, respect & dignity, wait time                                                                     |
| Montesinos-Segura | Disrespect and abuse during childbirth in fourteen hospitals in nine cities of Peru                                                                 | 2017 | Measurement | Peru               | labor and childbirth                       | Instrument not validated               | communication, respect & dignity, privacy, nondiscrimination, confidentiality, social support                   |
| Moosavivat        | Comparison of maternity care quality in teaching and non-teaching hospitals in Khorram Abad, Islamic Republic of Iran                               | 2011 | Measurement | Iran, Islamic Rep. | labor and childbirth, postnatal, newborn   | Used validated instrument              | communication, privacy                                                                                          |
| Mukamuri go       | Associations between perceptions of care and women's childbirth experience: a population-based cross-sectional study in Rwanda                      | 2017 | Measurement | Rwanda             | labor and childbirth                       | Has components of validated instrument | communication, respect & dignity, social support                                                                |
| Mulherin          | Weight stigma in maternity care: women's experiences and care providers' attitudes                                                                  | 2013 | Measurement | Australia          | antenatal, labor and childbirth, postnatal | Instrument not validated               | communication, respect & dignity, privacy, kindness, social support                                             |
| Mutaganzwa        | Advancing the health of women and newborns: predictors of patient satisfaction among women attending antenatal and maternity care in rural Rwanda   | 2018 | Measurement | Rwanda             | antenatal, labor and childbirth            | Instrument not validated               | communication, respect & dignity, privacy, confidentiality, affordability, ease of use of the system, wait time |
| Na                | An early stage evaluation of the Supporting Program for Obstetric Care Underserved Areas in                                                         | 2014 | Measurement | Korea, Rep.        | labor and childbirth                       | Instrument not validated               | kindness                                                                                                        |

| Korea     |                                                                                                                                                  |      |                           |            |                                                   |                                        |                                                                                                             |
|-----------|--------------------------------------------------------------------------------------------------------------------------------------------------|------|---------------------------|------------|---------------------------------------------------|----------------------------------------|-------------------------------------------------------------------------------------------------------------|
| Nababan   | Improving quality of care for maternal and newborn health: a pre-post evaluation of the Safe Childbirth Checklist at a hospital in Bangladesh    | 2017 | Program/Policy evaluation | Bangladesh | labor and childbirth                              | Has components of validated instrument | communication, social support                                                                               |
| Nnebue    | Clients' knowledge, perception and satisfaction with quality of maternal health care services at the primary health care level in Nnewi, Nigeria | 2014 | Measurement               | Nigeria    | antenatal, labor and childbirth, postnatal, other | Instrument not validated               | wait time                                                                                                   |
| Oikawa    | Assessment of maternal satisfaction with facility-based childbirth care in the rural region of Tambacouda, Senegal                               | 2014 | Measurement               | Senegal    | labor and childbirth                              | Instrument not validated               | communication, privacy, kindness, social support                                                            |
| Okafor    | Disrespect and abuse during facility-based childbirth in a low-income country                                                                    | 2015 | Measurement               | Nigeria    | labor and childbirth                              | Used validated instrument              | communication, respect & dignity, nondiscrimination, autonomy, confidentiality, privacy, social support     |
| Oladapo   | Quality of antenatal services at the primary care level in southwest Nigeria                                                                     | 2008 | Measurement               | Nigeria    | antenatal                                         | Has components of validated instrument | communication, respect & dignity, privacy, nondiscrimination, autonomy, kindness, social support, wait time |
| Onyeajam  | Antenatal care satisfaction in a developing country: a cross-sectional study from Nigeria                                                        | 2018 | Measurement               | Nigeria    | antenatal                                         | Instrument not validated               | communication, respect & dignity, privacy, nondiscrimination, kindness, affordability, wait time            |
| Oskay     | Evaluation of Patients' Satisfaction With Nursing Students' Care on a Perinatology Ward                                                          | 2015 | Measurement               | Turkey     | antenatal, labor and childbirth, other            | Used validated instrument              | communication, respect & dignity, kindness, social support                                                  |
| Overgaard | The impact of birthplace on women's birth experiences and perceptions of care                                                                    | 2012 | Measurement               | Denmark    | labor and childbirth, postnatal                   | Instrument not validated               | communication, respect & dignity, autonomy, social support, user voice                                      |

|                   |                                                                                                                                                                   |      |             |                |                                            |                                        |                                                                                                                   |
|-------------------|-------------------------------------------------------------------------------------------------------------------------------------------------------------------|------|-------------|----------------|--------------------------------------------|----------------------------------------|-------------------------------------------------------------------------------------------------------------------|
| Oweis             | Jordanian mother's report of their childbirth experience: findings from a questionnaire survey                                                                    | 2009 | Measurement | Jordan         | labor and childbirth                       | Used validated instrument              | communication, respect & dignity, privacy, nondiscrimination, autonomy, social support, ease of use of the system |
| Paul              | Improving satisfaction with care and reducing length of stay in an obstetric triage unit using a nurse-midwife-managed model of care                              | 2013 | Measurement | United States  | other                                      | Has components of validated instrument | communication, wait time                                                                                          |
| Phaladi-Digamela  | Community-physician-based versus hospital-based antenatal care: A comparison of patient satisfaction                                                              | 2014 | Measurement | South Africa   | antenatal                                  | Used validated instrument              | communication, respect & dignity, user voice, wait time                                                           |
| Pinidiyapathirage | Antenatal care provided and its quality in field clinics in Gampaha District, Sri Lanka                                                                           | 2007 | Measurement | Sri Lanka      | antenatal                                  | Instrument not validated               | communication                                                                                                     |
| Qureshi           | Patient satisfaction at tertiary care hospitals in Kashmir: a study from the Lala Ded Hospital Kashmir India                                                      | 2009 | Measurement | India          | other                                      | Instrument not validated               | communication, ease of use of the system                                                                          |
| Rabbani           | Service quality in contracted facilities                                                                                                                          | 2015 | Measurement | Pakistan       | antenatal                                  | Has components of validated instrument | communication                                                                                                     |
| Raj               | Associations Between Mistreatment by a Provider during Childbirth and Maternal Health Complications in Uttar Pradesh, India                                       | 2017 | Measurement | India          | labor and childbirth                       | Instrument not validated               | communication, respect & dignity, autonomy, nondiscrimination                                                     |
| Raleigh           | Ethnic and social inequalities in women's experience of maternity care in England: results of a national survey                                                   | 2010 | Measurement | United Kingdom | antenatal, labor and childbirth, postnatal | Has components of validated instrument | communication, respect & dignity, autonomy, social support, choice of provider, ease of use of the system         |
| Ratcliffe         | Mitigating disrespect and abuse during childbirth in Tanzania: an exploratory study of the effects of two facility-based interventions in a large public hospital | 2016 | Measurement | Tanzania       | labor and childbirth                       | Has components of validated instrument | respect & dignity                                                                                                 |



|              |                                                                                                                                                                                             |      |                           |                |                                            |                                        |                                                                                                              |
|--------------|---------------------------------------------------------------------------------------------------------------------------------------------------------------------------------------------|------|---------------------------|----------------|--------------------------------------------|----------------------------------------|--------------------------------------------------------------------------------------------------------------|
| Redshaw      | Validation of a perceptions of care adjective checklist                                                                                                                                     | 2009 | Instrument validation     | United Kingdom | labor and childbirth                       | Validation study                       | communication, respect & dignity, kindness, social support                                                   |
| Ribeiro      | CONTENTMENT OF PUERPERAL WOMEN ASSISTED BY OBSTETRIC NURSES                                                                                                                                 | 2018 | Measurement               | Brazil         | labor and childbirth                       | Instrument not validated               | communication, respect & dignity, kindness, social support                                                   |
| Robertson    | Comparison of centering pregnancy to traditional care in Hispanic mothers                                                                                                                   | 2009 | Measurement               | United States  | antenatal                                  | Has components of validated instrument | user voice                                                                                                   |
| Roosevelt    | Psychometric assessment of the Health Care Alliance Questionnaire with women in prenatal care                                                                                               | 2015 | Instrument validation     | United States  | antenatal                                  | Validation study                       | communication, respect & dignity, confidentiality, autonomy, kindness, social support                        |
| Rubashkin    | Assessing quality of maternity care in Hungary: expert validation and testing of the mother-centered prenatal care (MCPC) survey instrument                                                 | 2017 | Instrument validation     | Hungary        | antenatal, labor and childbirth, postnatal | Validation study                       | communication, respect & dignity, nondiscrimination, autonomy, user voice, affordability, choice of provider |
| Rudman       | Evaluating multi-dimensional aspects of postnatal hospital care                                                                                                                             | 2008 | Measurement               | Sweden         | postnatal                                  | Instrument not validated               | communication, respect & dignity, kindness                                                                   |
| Sabanaya gam | Attitudes and perceptions of pregnant women with CHD: results of a single-site survey                                                                                                       | 2017 | Measurement               | United States  | antenatal, postnatal                       | Instrument not validated               | communication, choice of provider                                                                            |
| Saggurti     | Effect of health intervention integration within women's self-help groups on collectivization and healthy practices around reproductive, maternal, neonatal and child health in rural India | 2018 | Program/Policy evaluation | India          | labor and childbirth                       | Instrument not validated               | social support                                                                                               |
| Saima        | Assessing patient satisfaction in gynaecology and obstetrics in tertiary care hospital                                                                                                      | 2015 | Measurement               | Pakistan       | other                                      | Has components of validated instrument | communication, respect & dignity, nondiscrimination, autonomy                                                |

|                  |                                                                                                                                                            |      |                       |                |                      |                          |                                                                                                             |
|------------------|------------------------------------------------------------------------------------------------------------------------------------------------------------|------|-----------------------|----------------|----------------------|--------------------------|-------------------------------------------------------------------------------------------------------------|
| Saizonou         | Quality Assessment of Refocused Antenatal Care Services at the District Hospital of Suru-Léré in Benin                                                     | 2014 | Measurement           | Benin          | antenatal            | Instrument not validated | communication, respect & dignity, affordability, ease of use of the system                                  |
| Sapountzi-Krepia | Mothers' experiences of maternity services: internal consistency and test-retest reliability of the Greek translation of the Kuopio Instrument for Mothers | 2009 | Instrument validation | Greece         | labor and childbirth | Validation study         | communication, respect & dignity, autonomy                                                                  |
| Sawyer           | Measuring parents' experiences and satisfaction with care during very preterm birth: a questionnaire development study                                     | 2014 | Instrument validation | United Kingdom | labor and childbirth | Validation study         | communication, kindness, social support, user voice                                                         |
| Sebastian        | Associations Between Maternity Care Practices and 2-Month Breastfeeding Duration Vary by Race, Ethnicity, and Acculturation                                | 2019 | Measurement           | Mexico         | labor and childbirth | Instrument not validated | communication, ease of use of the system                                                                    |
| Sethi            | The prevalence of disrespect and abuse during facility-based maternity care in Malawi: evidence from direct observations of labor and delivery             | 2017 | Measurement           | Malawi         | labor and childbirth | Instrument not validated | communication, respect & dignity, privacy, social support, user voice                                       |
| Sharma           | An investigation into mistreatment of women during labour and childbirth in maternity care facilities in Uttar Pradesh, India: a mixed methods study       | 2019 | Measurement           | India          | labor and childbirth | Instrument not validated | communication, respect & dignity, privacy, social support                                                   |
| Sheferaw         | Development of a tool to measure women's perception of respectful maternity care in public health facilities                                               | 2016 | Instrument validation | Ethiopia       | labor and childbirth | Validation study         | communication, respect & dignity, autonomy, privacy, social support, nondiscrimination, kindness, wait time |
| Shferaw          | Respectful maternity care in Ethiopian public health facilities                                                                                            | 2017 | Measurement           | Ethiopia       | labor and childbirth | Instrument not validated | communication, respect & dignity, privacy, social support, user voice                                       |

|                |                                                                                                                                                            |      |                       |                    |                                            |                           |                                                                                                   |
|----------------|------------------------------------------------------------------------------------------------------------------------------------------------------------|------|-----------------------|--------------------|--------------------------------------------|---------------------------|---------------------------------------------------------------------------------------------------|
| Shimizu        | Maternal perceptions of family-centred support and their associations with the mother-nurse relationship in the neonatal intensive care unit               | 2018 | Measurement           | Japan              | postnatal, newborn                         | Used validated instrument | communication, respect & dignity, autonomy, social support, user voice, ease of use of the system |
| Sholeye        | Client perception of antenatal care services at primary health centers in an urban area of Lagos, Nigeria                                                  | 2013 | Measurement           | Nigeria            | antenatal                                  | Instrument not validated  | communication, autonomy                                                                           |
| Siassakos      | A simple tool to measure patient perceptions of operative birth                                                                                            | 2009 | Instrument validation | United Kingdom     | labor and childbirth                       | Validation study          | communication, respect & dignity                                                                  |
| Sigurdardottir | The predictive role of support in the birth experience: A longitudinal cohort study                                                                        | 2017 | Measurement           | Iceland            | antenatal, labor and childbirth, postnatal | Instrument not validated  | social support                                                                                    |
| Soheily        | A Comparative Study of Satisfaction of Midwives and Mothers of Adherence to Patient Rights                                                                 | 2017 | Measurement           | Iran, Islamic Rep. | antenatal, labor and childbirth            | Instrument not validated  | communication, privacy, autonomy, user voice                                                      |
| Spira          | Improving the quality of maternity services in Nepal through accelerated implementation of essential interventions by healthcare professional associations | 2018 | Measurement of other  | Nepal              | labor and childbirth                       | Instrument not validated  | social support                                                                                    |
| Stojanovski    | The Influence of Ethnicity and Displacement on Quality of Antenatal Care: The Case of Roma, Ashkali, and Balkan Egyptian Communities in Kosovo             | 2017 | Measurement           | Kosovo             | antenatal                                  | Instrument not validated  | communication                                                                                     |
| Sword          | Quality of prenatal care questionnaire: psychometric testing in an Australia population                                                                    | 2015 | Instrument validation | Australia          | antenatal                                  | Validation study          | communication, respect & dignity, autonomy, kindness, social support                              |
| Takacs         | Social psychological predictors of satisfaction with intrapartum and postpartum care - what matters to women in Czech maternity                            | 2015 | Measurement           | Czech Republic     | labor and childbirth, postnatal            | Used validated instrument | communication, respect & dignity, autonomy                                                        |

hospitals?

|            |                                                                                                                                                                                           |      |                           |                |                                 |                          |                                                                                                       |
|------------|-------------------------------------------------------------------------------------------------------------------------------------------------------------------------------------------|------|---------------------------|----------------|---------------------------------|--------------------------|-------------------------------------------------------------------------------------------------------|
| Tan        | Investigating factors associated with success of breastfeeding in first-time mothers undergoing epidural analgesia: a prospective cohort study                                            | 2018 | Measurement of other      | Singapore      | labor and childbirth            | Instrument not validated | social support                                                                                        |
| Tancred    | Using mixed methods to evaluate perceived quality of care in southern Tanzania                                                                                                            | 2016 | Measurement               | Tanzania       | labor and childbirth            | Instrument not validated | respect & dignity, social support                                                                     |
| Tocchioni  | Socio-demographic determinants of women's satisfaction with prenatal and delivery care services in Italy                                                                                  | 2018 | Measurement               | Italy          | antenatal, labor and childbirth | Instrument not validated | communication, social support                                                                         |
| Tomlinson  | Improved management of stillbirth using a care pathway                                                                                                                                    | 2018 | Program/Policy evaluation | United Kingdom | labor and childbirth, postnatal | Instrument not validated | communication, respect & dignity, social support, user voice                                          |
| Tougher    | Effect of a multifaceted social franchising model on quality and coverage of maternal, newborn, and reproductive health-care services in Uttar Pradesh, India: a quasi-experimental study | 2018 | Program/Policy evaluation | India          | antenatal, labor and childbirth | Instrument not validated | communication, respect & dignity, autonomy, privacy, nondiscrimination, social support, affordability |
| Truijens   | Development of the Childbirth Perception Scale (CPS): perception of delivery and the first postpartum week                                                                                | 2014 | Instrument validation     | Netherlands    | labor and childbirth, postnatal | Validation study         | respect & dignity, social support                                                                     |
| Ulfsdottir | The association between labour variables and primiparous women's experience of childbirth; a prospective cohort study                                                                     | 2014 | Measurement               | Sweden         | labor and childbirth            | Instrument not validated | social support                                                                                        |
| Uludag     | Development and Testing of Women's Perception for the Scale of Supportive Care Given During Labor                                                                                         | 2015 | Instrument validation     | Turkey         | labor and childbirth            | Validation study         | communication, respect & dignity, privacy, kindness, social support, user voice                       |

|            |                                                                                                                                                  |      |                       |             |                                            |                           |                                                                                                                                         |
|------------|--------------------------------------------------------------------------------------------------------------------------------------------------|------|-----------------------|-------------|--------------------------------------------|---------------------------|-----------------------------------------------------------------------------------------------------------------------------------------|
| Vedam      | The Mothers on Respect (MOR) index: measuring quality, safety, and human rights in childbirth                                                    | 2017 | Instrument validation | Canada      | antenatal, labor and childbirth, postnatal | Validation study          | communication, respect & dignity, nondiscrimination, autonomy, choice of provider                                                       |
| Vinturache | Recall of Prenatal Counselling Among Obese and Overweight Women from a Canadian Population: A Population Based Study                             | 2017 | Instrument validation | Canada      | antenatal                                  | Instrument not validated  | communication, user voice                                                                                                               |
| Wang       | Perceived Needs of Parents of Premature Infants in NICU                                                                                          | 2018 | Measurement           | China       | postnatal, newborn                         | Used validated instrument | communication, respect & dignity, social support, ease of use of the system                                                             |
| Wassihun   | Prevalence of disrespect and abuse of women during child birth and associated factors in Bahir Dar town, Ethiopia                                | 2018 | Measurement           | Ethiopia    | labor and childbirth                       | Instrument not validated  | communication, respect & dignity, autonomy, privacy, nondiscrimination, confidentiality, social support, user voice                     |
| Wassihun   | Compassionate and respectful maternity care during facility based child birth and women's intent to use maternity service in Bahir Dar, Ethiopia | 2018 | Measurement           | Ethiopia    | labor and childbirth                       | Instrument not validated  | communication, respect & dignity, nondiscrimination, confidentiality, kindness, wait time                                               |
| Wesson     | Provider and client perspectives on maternity care in Namibia: results from two cross-sectional studies                                          | 2018 | Measurement           | Namibia     | labor and childbirth                       | Instrument not validated  | communication, respect & dignity, privacy, nondiscrimination, confidentiality, social support, affordability, ease of use of the system |
| Wiegers    | The quality of maternity care services as experienced by women in the Netherlands                                                                | 2009 | Measurement           | Netherlands | antenatal, labor and childbirth, postnatal | Used validated instrument | communication, respect & dignity, user voice                                                                                            |
| Ziabakhsh  | Voices of Postpartum Women: Exploring Canadian Women's Experiences of Inpatient Postpartum Care                                                  | 2018 | Measurement           | Canada      | postnatal, newborn                         | Instrument not validated  | communication, kindness, social support, user voice                                                                                     |
